# Supplementary material for: Tendinopathies and Pain Sensitisation: A Meta-Analysis with Meta-Regression
Source: MDPI journal article supplement (doi:10.3390/biomedicines10071749), 2022-07-20
Supplement: s1 [file s1]

**Table S1.** Results of the risk of bias assessment with the Newcastle-Ottawa Scale.

| Study                        | Adequate case definition | Representativeness of cases | Selection of controls | Definition of controls | Controlled for age | Controlled for other factors | Ascertainment of exposure | Same method for cases and controls | Non response rate |
|------------------------------|--------------------------|-----------------------------|-----------------------|------------------------|--------------------|------------------------------|---------------------------|------------------------------------|-------------------|
| Alburquerque-Sendín, 2013    | x                        | x                           | x                     | x                      | x                  | x                            | x                         | x                                  | NA                |
| Bisset, 2006                 | x                        | x                           | x                     | x                      | x                  | x                            | x                         | x                                  | NA                |
| Chimenti, 2020               | x                        | x                           | x                     | x                      | x                  | x                            | x                         | x                                  | NA                |
| Coombs, 2012                 | x                        | x                           | x                     | x                      | x                  | x                            | x                         | x                                  | NA                |
| Eckenrode, 2018              | x                        | x                           | x                     | x                      | x                  | x                            | x                         | x                                  | NA                |
| Fernández-Carnero, 2009      | x                        | x                           | x                     | x                      | x                  | x                            | x                         | x                                  | NA                |
| Fernandez-Carnero, 2009      | x                        | x                           | x                     | x                      | x                  | x                            | x                         | x                                  | NA                |
| Fernández-de-las-Peñas, 2010 | x                        |                             | x                     | x                      | x                  | x                            | x                         | x                                  | NA                |
| Ferrer-Pena, 2019            | x                        | x                           | NA                    | NA                     | NA                 | NA                           | x                         | NA                                 | NA                |
| French, 2019                 | x                        | x                           | x                     | x                      | x                  | x                            | x                         | x                                  | NA                |
| Garnevall, 2013              | x                        | x                           | x                     | x                      | x                  | x                            | x                         | x                                  | NA                |
| Gwilym, 2010                 | x                        | x                           | x                     | x                      | x                  | x                            | x                         | x                                  | NA                |
| Hamstra-Wright, 2020         | x                        |                             | x                     | x                      | x                  | x                            | x                         | x                                  | NA                |
| Hidalgo-Lozano, 2010         | x                        | x                           | x                     | x                      | x                  | x                            | x                         | x                                  | NA                |
| Jespersen, 2013              | x                        |                             | x                     | x                      | x                  | x                            | x                         | x                                  | NA                |
| Karasugi, 2016               | x                        | x                           | NA                    | NA                     | NA                 | NA                           | x                         | NA                                 | NA                |
| Ko, 2018                     | x                        | x                           | NA                    | NA                     | NA                 | NA                           | x                         | NA                                 | NA                |
| Kregel, 2013                 | x                        | x                           | x                     | x                      | x                  | x                            | x                         | x                                  | NA                |

|                        |   |   |    |    |    |    |   |    |    |
|------------------------|---|---|----|----|----|----|---|----|----|
| Lagas, 2021            | x | x | NA | NA | NA | NA | x | NA | NA |
| Lim, 2010              | x | x | x  | x  | x  | x  | x | x  | NA |
| Lim, 2017              | x | x | x  | x  | x  | x  | x | x  | NA |
| Paul, 2012             | x | x | x  | x  |    |    | x | x  | NA |
| Plaza-Manzano, 2019    | x | x | x  | x  | x  | x  | x | x  | NA |
| Plinsinga, 2017        | x | x | x  | x  | x  | x  | x | x  | NA |
| Plinsinga, 2020 (GTPS) | x |   | x  | x  | x  |    | x | x  | NA |
| Plinsinga, 2020 (PT)   | x | x | x  | x  | x  |    | x | x  | NA |
| Riel, 2019             | x | x | x  | x  | x  |    | x | x  | NA |
| Slater, 2004           | x | x | x  | x  | x  | x  | x | x  | NA |
| Tompra, 2016           | x | x | x  | x  | x  | x  | x | x  | NA |
| Ruiz-Ruiz, 2011        | x | x | x  | x  | x  | x  | x | x  | NA |
| Vallance, 2021         | x |   | x  | x  | x  | x  | x | x  | NA |
| Van Wilgen, 2013       | x |   | x  | x  | x  | x  | x | x  | NA |
| Wheeler, 2017          | x | x | NA | NA | NA | NA | x | NA | NA |
| Wheeler, 2019          | x | x | NA | NA | NA | NA | x | NA | NA |

NA: Not applicable.
